# Supplementary material for: ARID1B alterations identify aggressive tumors in neuroblastoma
Source: PubMed Central journal article supplement (PMC5542239; doi:10.18632/oncotarget.17500), 2017-04-28
Supplement: oncotarget-08-45943-s001.pdf [file oncotarget-08-45943-s001.pdf]

# ARID1B alterations identify aggressive tumors in neuroblastoma

## SUPPLEMENTRY MATERIALS

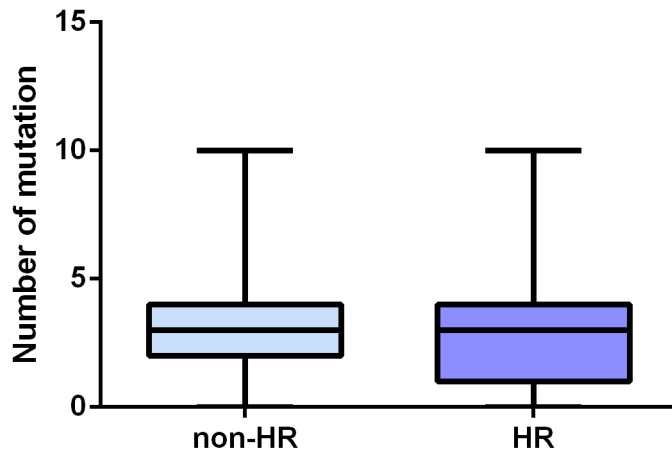

Supplementary Figure 1: The mutation rate was not different according to the risk group.

| ID     | Gene | Exon   | AA change | dbSNP       | Chr  | Start    | Ref | Alt | RefC | AltC | VAF (CancerSCAN) | VAF (dPCR) |
|--------|------|--------|-----------|-------------|------|----------|-----|-----|------|------|------------------|------------|
| NBL-44 | ALK  | exon25 | R1275Q    | rs113994087 | chr2 | 29432664 | C   | T   | 323  | 31   | 0.088            | 0.082      |
| NBL-39 | ALK  | exon25 | R1275Q    | rs113994087 | chr2 | 29432664 | C   | T   | 746  | 50   | 0.063            | 0.075      |
| NBL-27 | ALK  | exon25 | R1275Q    | rs113994087 | chr2 | 29432664 | C   | T   | 599  | 74   | 0.110            | 0.119      |

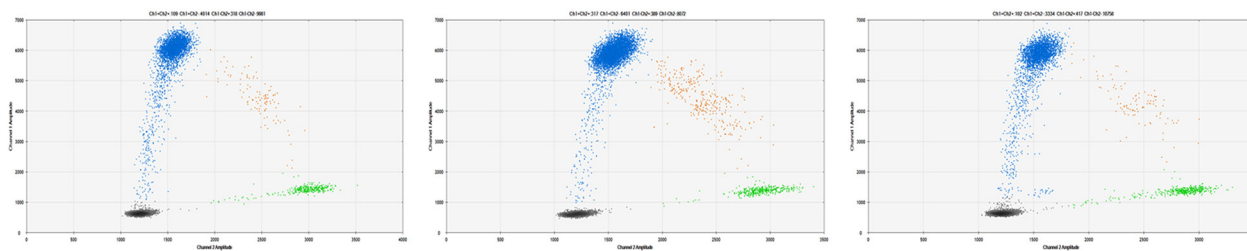

Supplementary Figure 2: Three R1275Q, an activating ALK mutation, were also confirmed with digital PCR method.

**Supplementary Table 1: CancerSCAN™ v1.1.**

**See Supplementary File 1**

**Supplementary Table 2: SNV/Indel.**

**See Supplementary File 1**

**Supplementary Table 3: Genetic markers for targeted therapies.**

**See Supplementary File 1**

**Supplementary Table 4: Patient characteristics.**

**See Supplementary File 1**

**Supplementary Table 5: Sequencing coverage.**

**See Supplementary File 1**
